# Supplementary material for: VA Disability Compensation and Money Spent on Substance Use Among Homeless Veterans: A Controversial Association
Source: Atypon-hosted journal article supplement (doi:10.1176/appi.ps.201400245), 2015-03-02
Supplement: appi.ps.201400245.ds001.pdf [file appi.ps.201400245.ds001.pdf]

 


Psychiatry Online
