# Supplementary material for: VA Disability Compensation and Money Spent on Substance Use Among Homeless Veterans: A Controversial Association
Source: Atypon-hosted journal article supplement (doi:10.1176/appi.ps.201400245), 2015-03-02
Supplement: appi.ps.201400245.ds001.pdf [file appi.ps.201400245.ds001.pdf]

Supplementary Table. Days and money spent on substance use among homeless veterans

| <b>Substance Use</b>                                      | <b>N= 1,160</b> |
|-----------------------------------------------------------|-----------------|
| Mean days of alcohol use, past month                      | 5.72 (10.23)    |
| 0 days                                                    | 727 (62.62%)    |
| 1-10 days                                                 | 185 (15.93%)    |
| 11-20 days                                                | 87 (7.49%)      |
| 21-30 days                                                | 158 (13.61%)    |
| Mean number of glasses of wine daily                      | 1.01 (3.55)     |
| 0 glasses                                                 | 1007 (86.74%)   |
| 1-5 glasses                                               | 57 (4.91%)      |
| 6+ glasses                                                | 95 (8.18%)      |
| Mean number of cans of beer daily                         | 2.94 (6.68)     |
| 0 cans                                                    | 807 (69.51%)    |
| 1-5 cans                                                  | 133 (11.46%)    |
| 6+ cans                                                   | 219 (18.86%)    |
| Mean number of shots of liquor daily                      | 2.41 (6.39)     |
| 0 shots                                                   | 931 (80.19%)    |
| 1-5 shots                                                 | 44 (3.79%)      |
| 6+ shots                                                  | 183 (15.76%)    |
| Mean dollars spent on alcohol, past month                 | 52.92 (180.02)  |
| \$0                                                       | 774 (66.72%)    |
| \$1-50                                                    | 167 (14.40%)    |
| \$51-150                                                  | 117 (10.09%)    |
| \$151-300                                                 | 58 (5.00%)      |
| \$301+                                                    | 44 (3.79%)      |
| Accumulated mean days of any drug use, past month         | 5.89 (15.80)    |
| 0 days                                                    | 866 (74.59%)    |
| 1-5 days                                                  | 83 (7.15%)      |
| 6+ days                                                   | 203 (17.48%)    |
| Mean days used heroin/methadone/opiates, past month       | .57 (3.63)      |
| 0 days                                                    | 1,103 (95.00%)  |
| 1-5 days                                                  | 24 (2.07%)      |
| 6+ days                                                   | 29 (2.50%)      |
| Mean days used "downers" (e.g., barbiturates), past month | .25 (2.28)      |
| 0 days                                                    | 1,129 (97.24%)  |
| 1-5 days                                                  | 12 (1.03%)      |
| 6+ days                                                   | 13 (1.12%)      |
| Mean days used "crack", past month                        | 2.61 (7.49)     |
| 0 days                                                    | 959 (82.60%)    |
| 1-5 days                                                  | 65 (5.60%)      |
| 6+ days                                                   | 129 (11.11%)    |
| Mean days used cocaine, past month                        | 1.17 (5.08)     |

|                                                                   |                 |
|-------------------------------------------------------------------|-----------------|
| 0 days                                                            | 1,061 (91.39%)  |
| 1-5 days                                                          | 30 (2.58%)      |
| 6+ days                                                           | 63 (5.43%)      |
| Mean days used amphetamines, past month                           | .17 (2.00)      |
| 0 days                                                            | 1,134 (97.67%)  |
| 1-5 days                                                          | 12 (1.03%)      |
| 6+ days                                                           | 8 (0.69%)       |
| Mean days used cannabis, past month                               | 1.09 (4.63)     |
| 0 days                                                            | 1027 (88.46%)   |
| 1-5 days                                                          | 70 (6.03%)      |
| 6+ days                                                           | 57 (4.91%)      |
| Mean days used other drugs (hallucinogens, inhalants), past month | .05 (1.02)      |
| 0 days                                                            | 1,142 (98.36%)  |
| 1-5 days                                                          | 3 (0.26%)       |
| 6+ days                                                           | 3 (0.26%)       |
| Mean dollars spent on drugs, past month                           | 125.89 (474.18) |
| \$0                                                               | 903 (77.84%)    |
| \$1-50                                                            | 34 (2.93%)      |
| \$51-150                                                          | 40 (3.45%)      |
| \$151-300                                                         | 68 (5.86%)      |
| \$301-1,000                                                       | 84 (7.24%)      |
| \$1,001+                                                          | 31 (2.67%)      |
